# Supplementary material
Source: HighWire-hosted journal article supplement (https://erj.ersjournals.com/content/56/3/2002773)
Supplement: inline-supplementary-material-1 [file inline-supplementary-material-1.pdf]

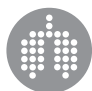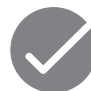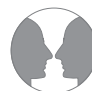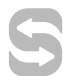

SHAREABLE PDF

# Antibiotics for paediatric community-acquired pneumonia in resource-constrained settings

Amy Sarah Ginsburg<sup>1</sup> and Keith P. Klugman<sup>2</sup>

**Affiliations:** <sup>1</sup>University of Washington, Seattle, WA, USA. <sup>2</sup>Bill and Melinda Gates Foundation, Seattle, WA, USA.

**Correspondence:** Amy Sarah Ginsburg, University of Washington Clinical Trial Center Building 29, Suite 250, 6200 NE 74th Street, Seattle, WA, 98115, USA. E-mail: [messageforamy@gmail.com](mailto:messageforamy@gmail.com)

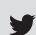

@ERSpublications

3 days of amoxicillin may be sufficient to treat most non-severe community-acquired paediatric pneumonia in resource-constrained settings <https://bit.ly/3jmQSTX>

**Cite this article as:** Ginsburg AS, Klugman KP. Antibiotics for paediatric community-acquired pneumonia in resource-constrained settings. *Eur Respir J* 2020; 56: 2002773 [<https://doi.org/10.1183/13993003.02773-2020>].

This single-page version can be shared freely online.

## To the Editor:

Despite *Streptococcus pneumoniae* and *Haemophilus influenzae* type b vaccination strategies, pneumonia remains the leading infectious cause of child mortality. Greater access to appropriate treatment is critical; however, defining “appropriate” is problematic. World Health Organization (WHO) guidelines recommend diagnosing pneumonia using clinical signs and a non-specific, pragmatic case definition: fast breathing or chest indrawing (pneumonia) and presence of WHO danger signs (severe pneumonia) in children with cough or difficulty breathing [1]. It is unclear whether all “pneumonia” using these definitions needs to be treated with antibiotics, and if so, for how long.
